# Supplementary material for: Synthesis of Pt(ii) phosphinocarboxylate complexes with auxiliary arylcarbene ligands and factors that control their stereochemistry
Source: Royal Society of Chemistry journal article supplement (doi:10.1039/d3nj03729k), 2023-01-01
Supplement: d3nj03729k1.pdf [file d3nj03729k1.pdf]

## Supporting Information

for

### **Synthesis of Pt(II) phosphinocarboxylate complexes with auxiliary arylcarbene ligands and factors that control their stereochemistry**

Filip Horký,<sup>a</sup> Johannes Soellner,<sup>b</sup> Jiří Schulz,<sup>a</sup> Ivana Císařová,<sup>a</sup>

Thomas Strassner\*<sup>b</sup> and Petr Štěpnička\*

<sup>a</sup> *Department of Inorganic Chemistry, Faculty of Science, Charles University, Hlavova 2030,  
128 40 Prague, Czech Republic;* <sup>b</sup> *Physikalische Organische Chemie, Technische Universität Dresden,  
Bergstrasse 66, 01069 Dresden, Germany*

## X-ray crystallography

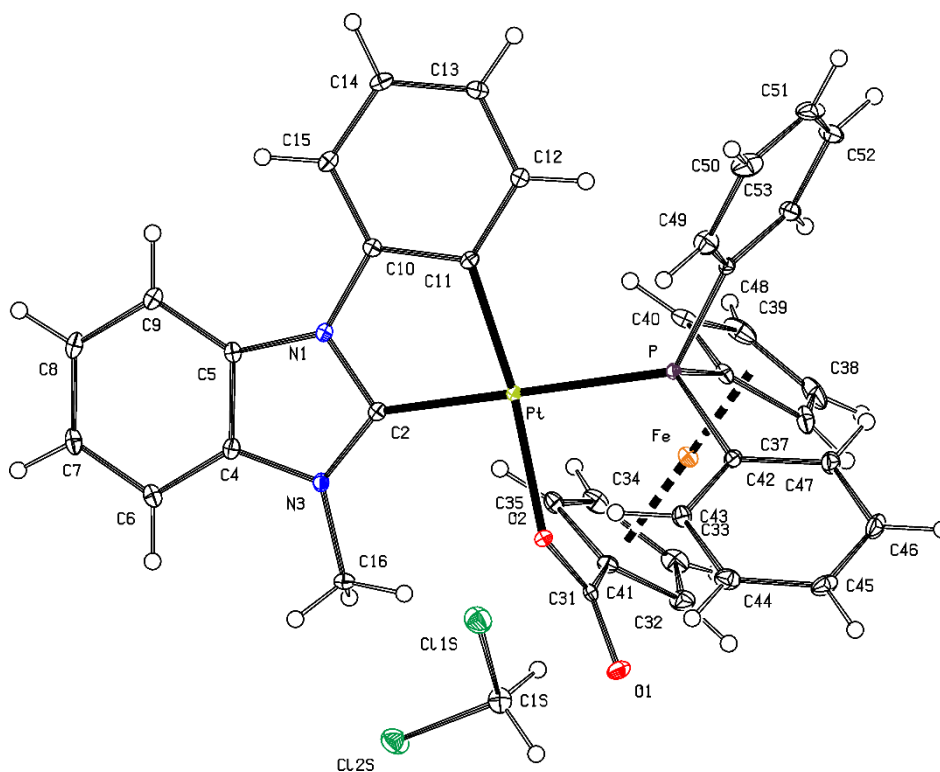

**Figure S1.** PLATON plot of the structure of  $2^{\text{Me}} \cdot \text{CH}_2\text{Cl}_2$  showing 30% probability displacement ellipsoids.

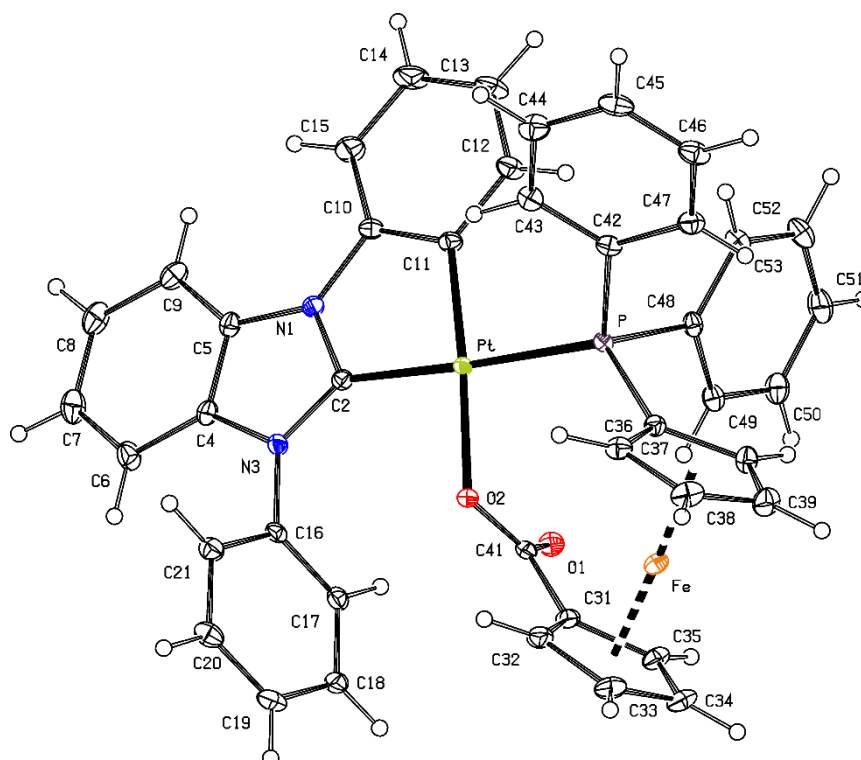

**Figure S2.** PLATON plot of the structure of  $2^{\text{Ph}} \cdot \frac{1}{2} \text{AcOEt}$  showing 30% probability displacement ellipsoids. The solvent molecule was eliminated using PLATON/SQUEEZE (see main text).

**Table S1.** Selected crystallographic data and structure refinement parameters

| Compound                                         | <b>2<sup>Me</sup>·CH<sub>2</sub>Cl<sub>2</sub></b>                                  | <b>2<sup>Ph</sup>·½AcOEt</b>                                        |
|--------------------------------------------------|-------------------------------------------------------------------------------------|---------------------------------------------------------------------|
| Formula                                          | C <sub>38</sub> H <sub>31</sub> Cl <sub>2</sub> FeN <sub>2</sub> O <sub>2</sub> Ppt | C <sub>44</sub> H <sub>35</sub> FeN <sub>2</sub> O <sub>3</sub> Ppt |
| <i>M</i>                                         | 900.46                                                                              | 921.65                                                              |
| Crystal system                                   | triclinic                                                                           | monoclinic                                                          |
| Space group                                      | <i>P</i> -1 (no. 2)                                                                 | <i>C2/c</i> (no. 15)                                                |
| <i>T</i> [K]                                     | 120(2)                                                                              | 150(2)                                                              |
| <i>a</i> [Å]                                     | 10.9275(7)                                                                          | 24.479(1)                                                           |
| <i>b</i> [Å]                                     | 12.1821(7)                                                                          | 11.2400(5)                                                          |
| <i>c</i> [Å]                                     | 13.5028(8)                                                                          | 26.612(1)                                                           |
| $\alpha$ [°]                                     | 90.484(2)                                                                           | 90                                                                  |
| $\beta$ [°]                                      | 92.307(2)                                                                           | 102.805(1)                                                          |
| $\gamma$ [°]                                     | 115.888(2)                                                                          | 90                                                                  |
| <i>V</i> [Å <sup>3</sup> ]                       | 1615.1(2)                                                                           | 7140.1(5)                                                           |
| <i>Z</i>                                         | 2                                                                                   | 8                                                                   |
| $\mu$ (Mo K $\alpha$ ) [mm <sup>-1</sup> ]       | 5.030                                                                               | 4.411                                                               |
| Diffns collected                                 | 30790                                                                               | 46973                                                               |
| Independent diffns                               | 7396                                                                                | 8231                                                                |
| Observed diffns <sup>[a]</sup>                   | 7294                                                                                | 7746                                                                |
| <i>R</i> <sub>int</sub> <sup>[b]</sup> [%]       | 1.97                                                                                | 2.54                                                                |
| No. of parameters                                | 426                                                                                 | 461                                                                 |
| <i>R</i> <sup>[b]</sup> obsd diffns [%]          | 1.27                                                                                | 1.58                                                                |
| <i>R</i> , <i>wR</i> <sup>[b]</sup> all data [%] | 1.30, 3.07                                                                          | 1.79, 3.63                                                          |
| $\Delta\rho$ [e Å <sup>-3</sup> ]                | 0.46, -0.69                                                                         | 0.68, -0.56                                                         |
| CCDC deposition number                           | 2284526                                                                             | 2284527                                                             |

[a] Diffractions with  $I > 2\sigma(I)$ . [b] Definitions:  $R_{\text{int}} = \Sigma |F_o^2 - F_o^2(\text{mean})| / \Sigma F_o^2$ , where  $F_o^2(\text{mean})$  is the average intensity of symmetry-equivalent diffractions.  $R = \Sigma ||F_o| - |F_c|| / \Sigma |F_o|$ ,  $wR = [\Sigma \{w(F_o^2 - F_c^2)^2\} / \Sigma w(F_o^2)^2]^{1/2}$ .

## Additional cyclic voltammograms

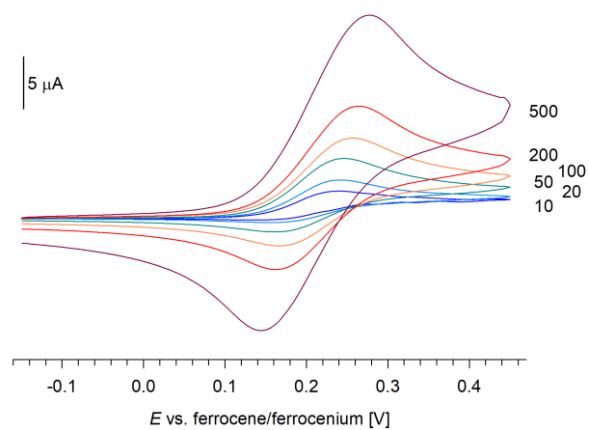

**Figure S3** Cyclic voltammograms of **2<sup>Ph</sup>** ( $\approx 0.1$  mM) recorded at varying scan rates (given in  $\text{mV s}^{-1}$  in the Figure) at glassy carbon electrode in dichloromethane containing  $\text{Bu}_4\text{N}[\text{PF}_6]$  (0.1 M) as the supporting electrolyte

## Frontier orbitals and electron density difference on going from $2^{\text{Ph}}$ to $2^{\text{Ph}}$

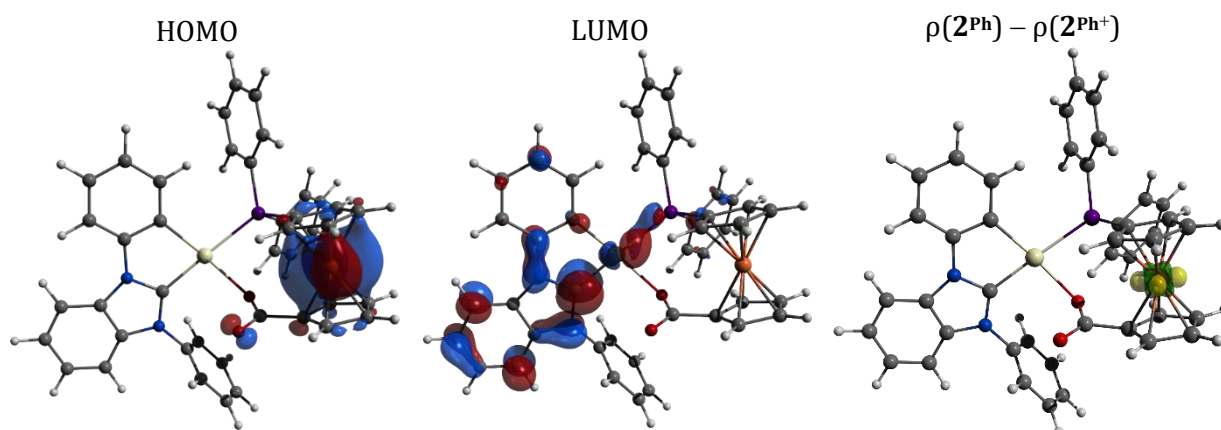

**Figure S4** Frontier orbitals of  $2^{\text{Ph}}$  (contour maps with isosurfaces at  $\pm 0.04$  a.u.) computed at the B3LYP(d3bj)/6-311+G(d,p):LanL2TZ(Pt) level of theory, and the electron difference map for  $\rho(2^{\text{Ph}}) - \rho(2^{\text{Ph}^+})$  mapped at the equilibrium geometry of  $2^{\text{Ph}}$  (isosurface at  $\pm 0.02$  a.u.)

**Selected intrinsic bond orbitals (IBOs) for 2<sup>Me</sup>, 3<sup>Me</sup>, 2<sup>Ph</sup>, and 3<sup>Ph</sup>**

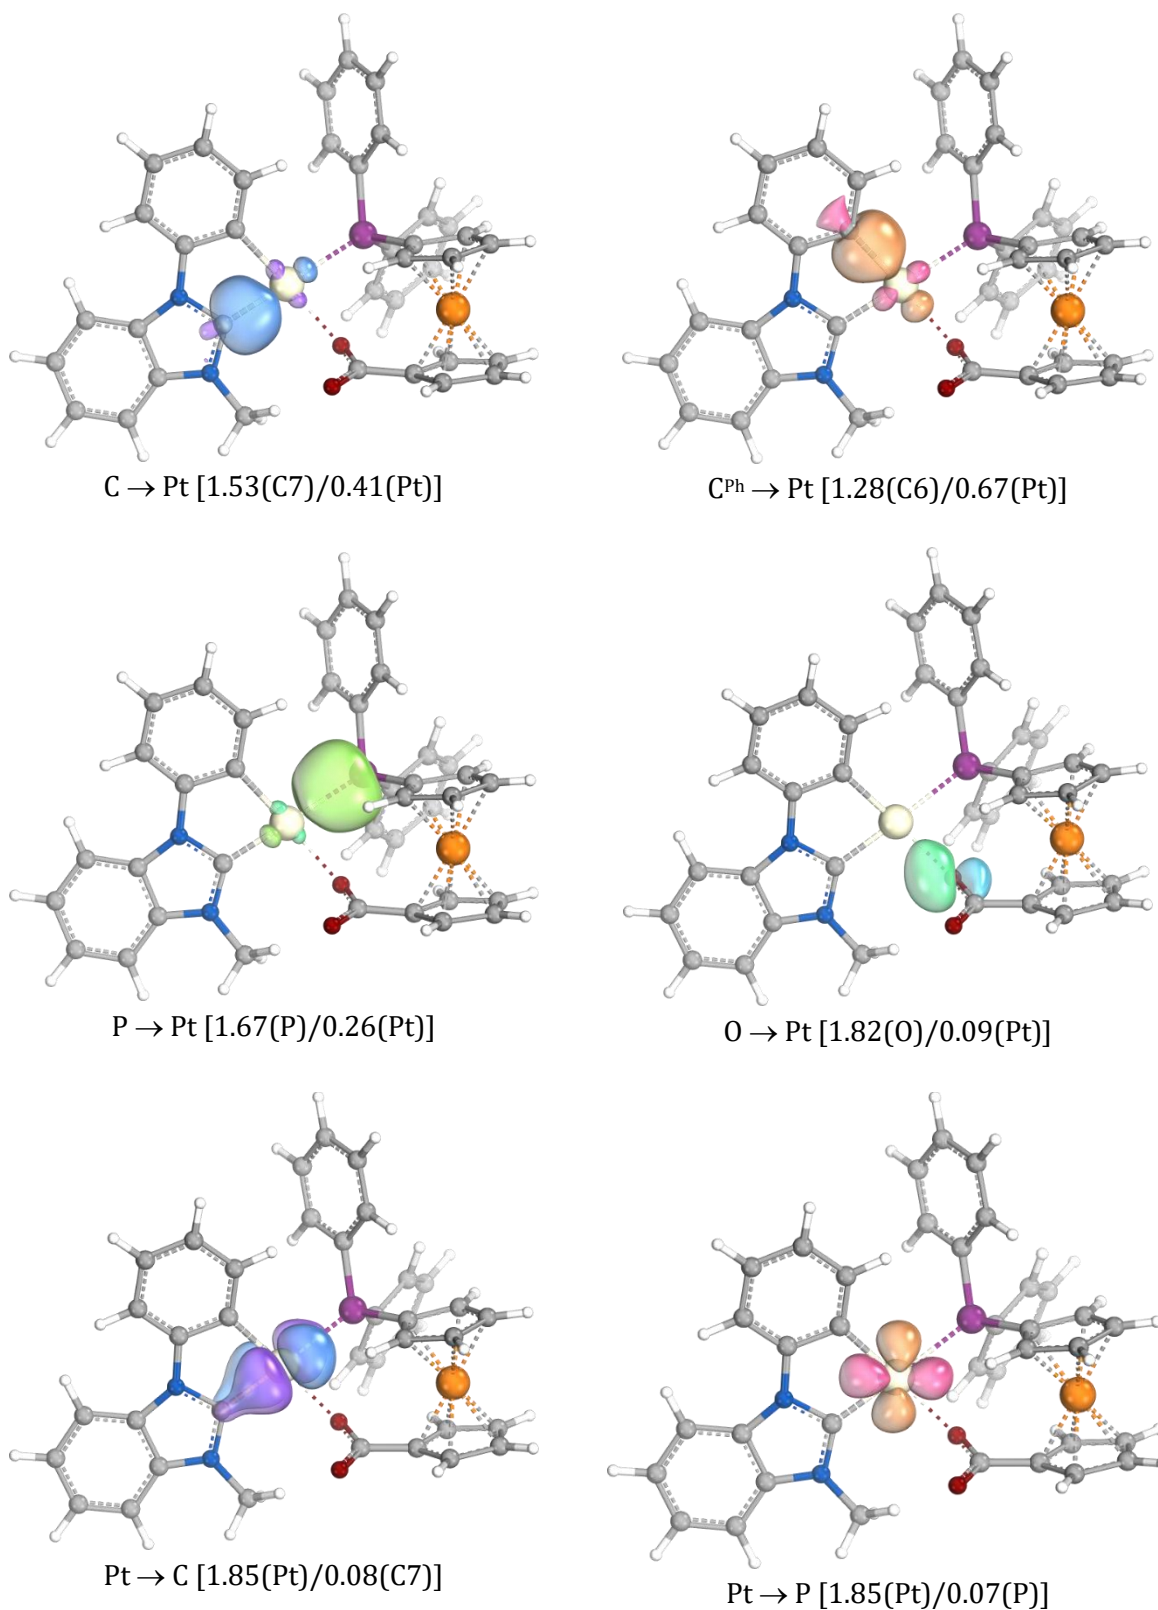

**Figure S5** Selected intrinsic bond orbitals (IBOs) of 2<sup>Me</sup>. Values in parentheses indicate the fraction of bonding electrons assigned to the individual atoms

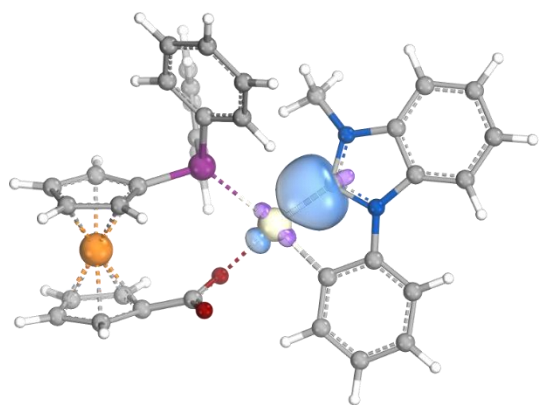

C → Pt [1.51(C7)/0.43(Pt)]

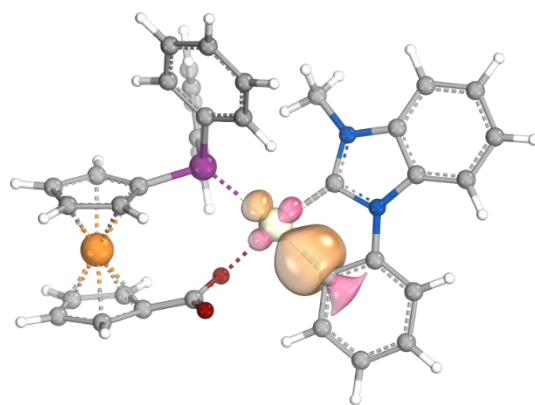

C<sup>Ph</sup> → Pt [1.27(C6)/0.68(Pt)]

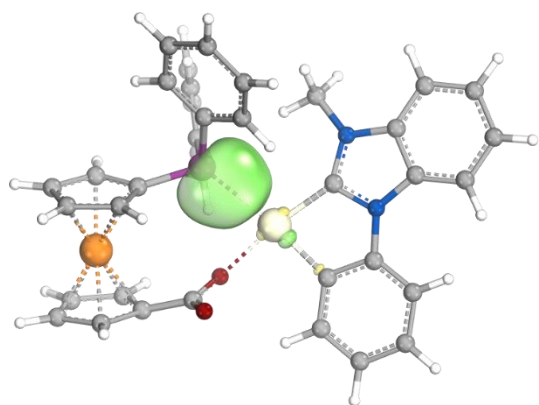

P → Pt [1.73(P)/0.18(Pt)]

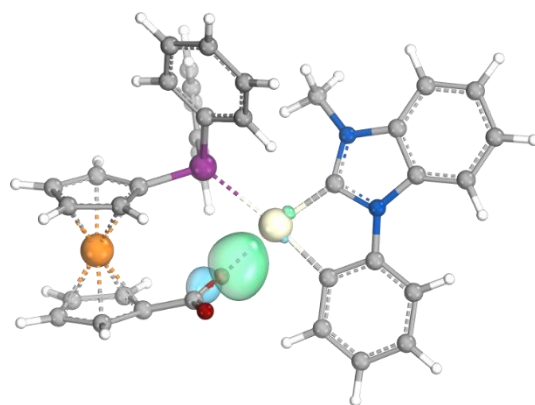

O → Pt [1.72(O)/0.19(Pt)]

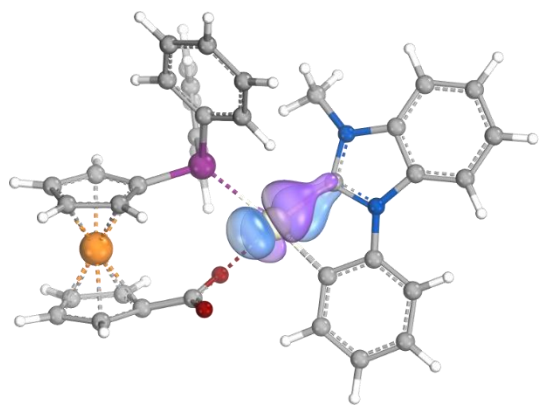

Pt → C [1.83(Pt)/0.12(C7)]

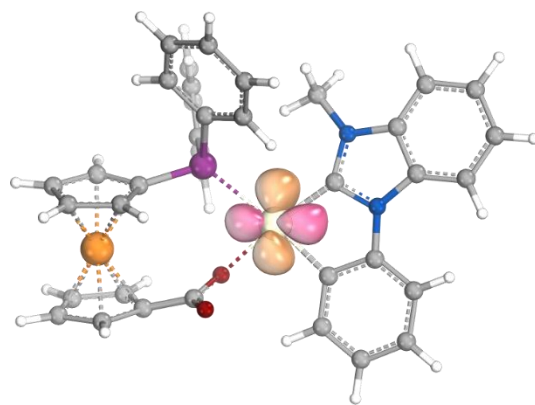

Pt → P [1.92(Pt)/0.02(P)]

**Figure S6** Selected intrinsic bond orbitals (IBOs) of **3<sup>Me</sup>**. Values in parentheses indicate the fraction of bonding electrons assigned to the individual atoms

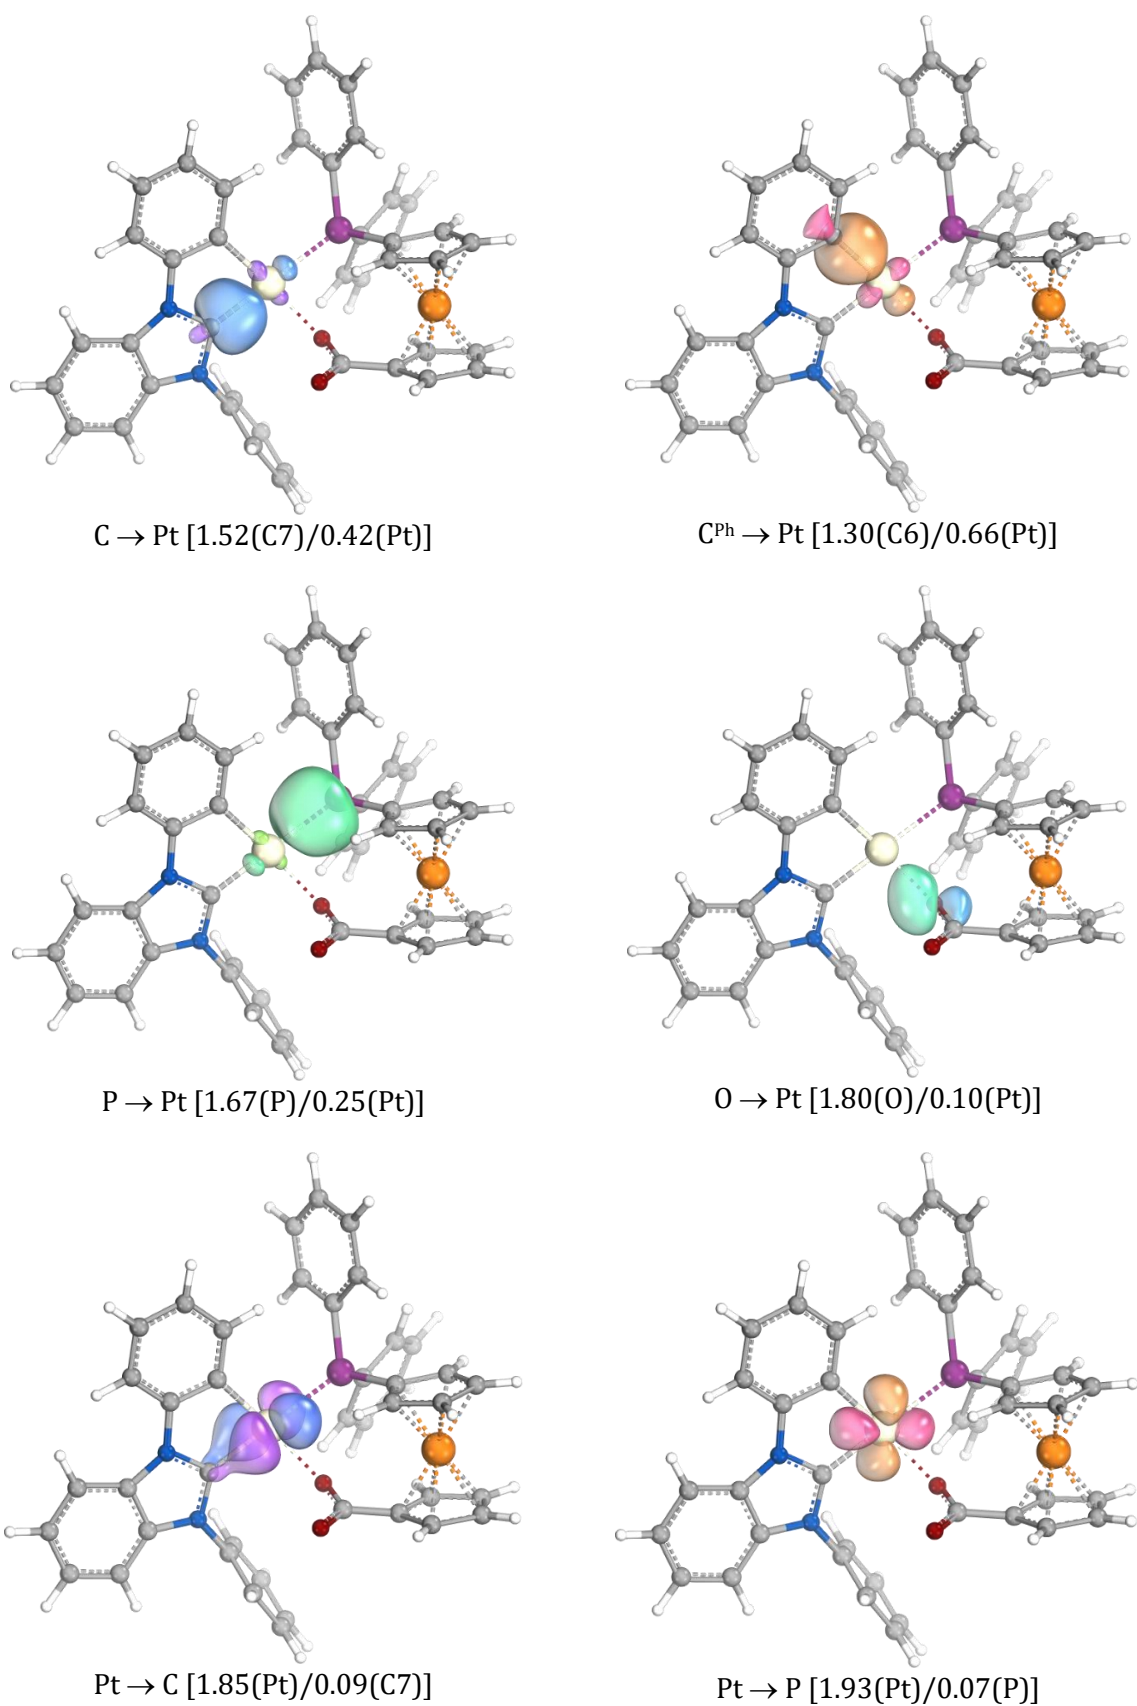

**Figure S7** Selected intrinsic bond orbitals (IBOs) of **2<sup>Ph</sup>**. Values in parentheses indicate the fraction of bonding electrons assigned to the individual atoms



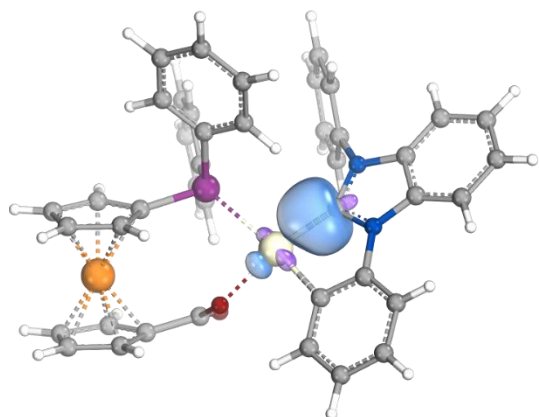

C → Pt [1.51(C7)/0.43(Pt)]

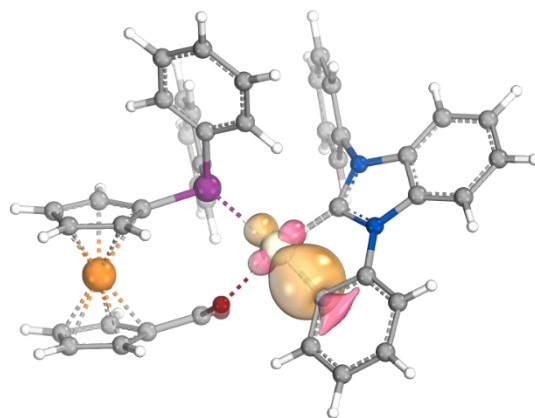

C<sup>Ph</sup> → Pt [1.27(C<sup>Ph</sup>)/0.68(Pt)]

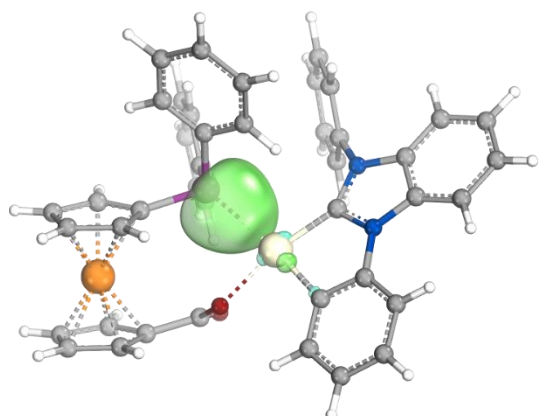

P → Pt [1.74(P)/0.17(Pt)]

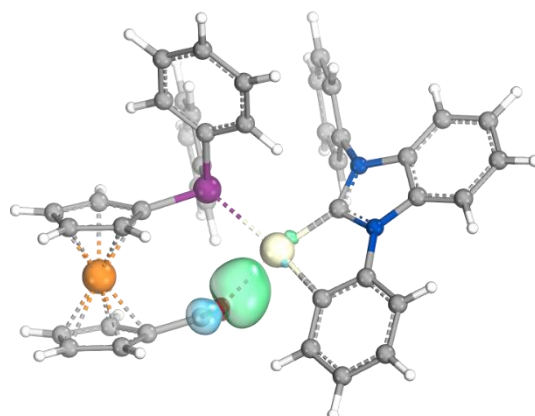

O → Pt [1.72(O)/0.19(Pt)]

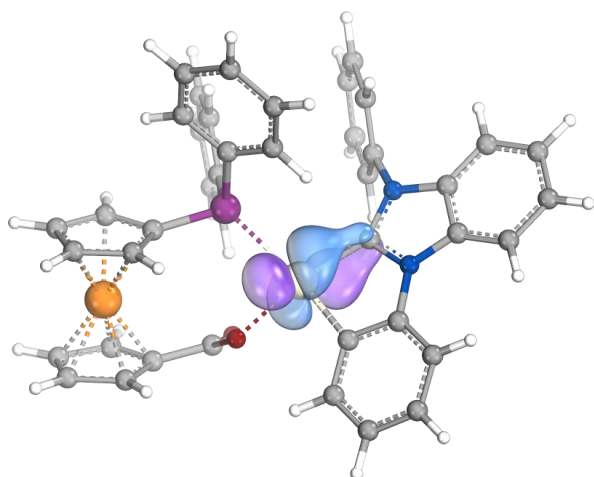

Pt → C [1.82(Pt)/0.13(C7)]

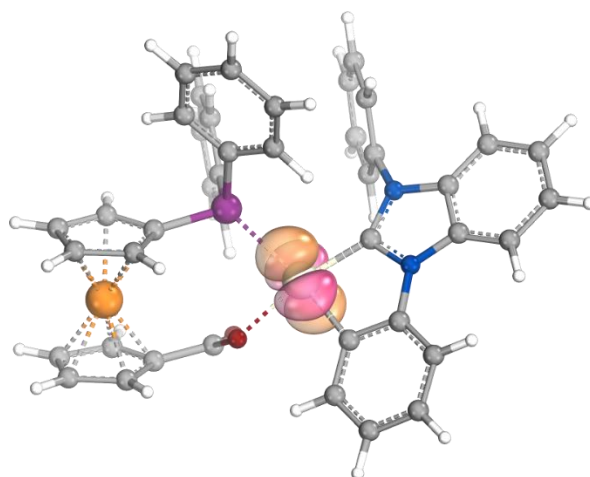

Pt → P [1.93(Pt)/0.00(P), 0.02(C6)]

**Figure S8** Selected intrinsic bond orbitals (IBOs) of **3<sup>Ph</sup>**. Values in parentheses indicate the fraction of bonding electrons assigned to the individual atoms

## Copies of the NMR spectra

(Note: solvent signals in the NMR spectra are marked by an asterisk.)

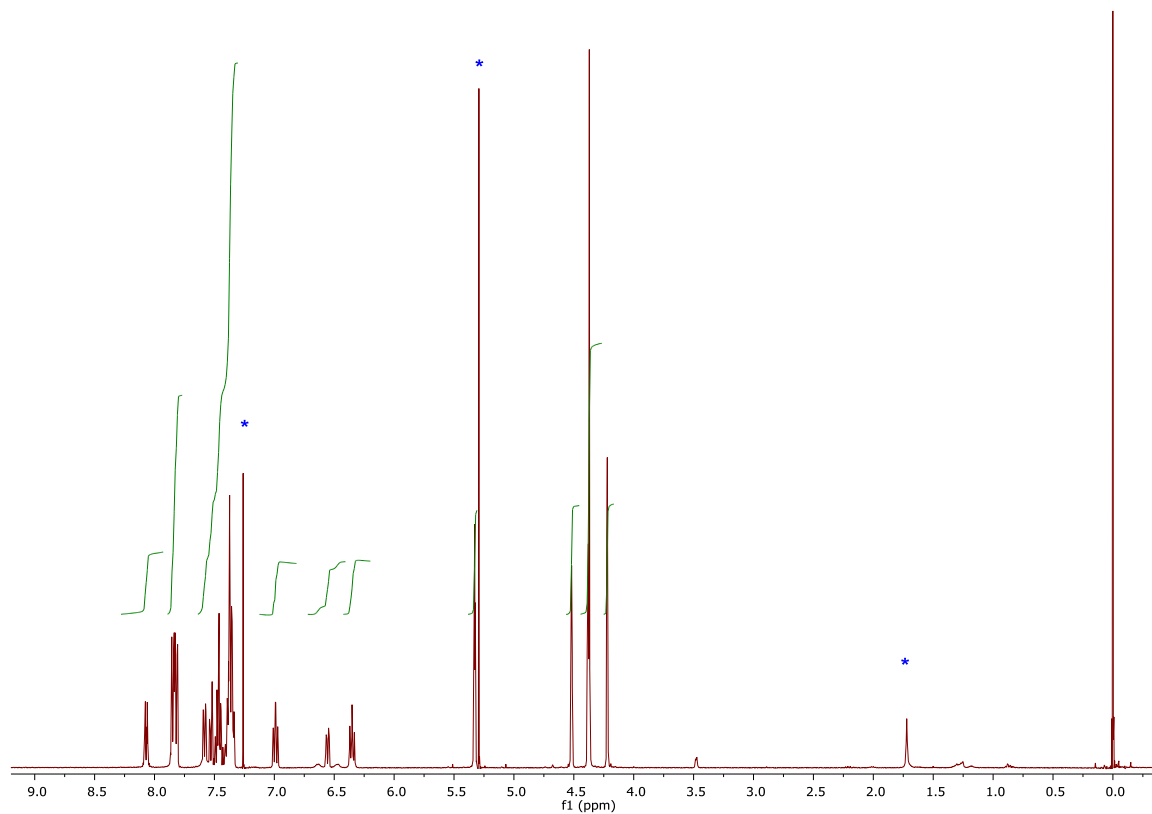

**Figure S9**  $^1\text{H}$  NMR spectrum (400 MHz,  $\text{CDCl}_3$ ) of **2<sup>Me</sup>**

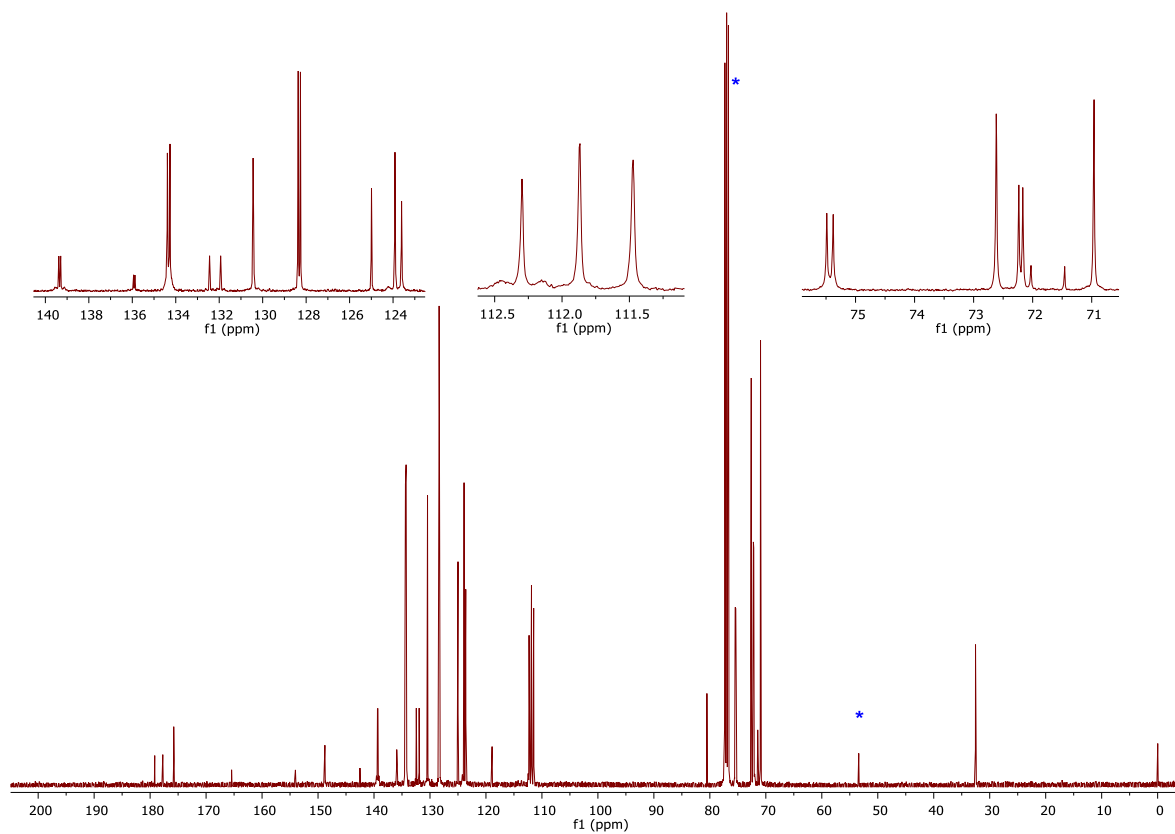

**Figure S10**  $^{13}\text{C}\{^1\text{H}\}$  NMR spectrum (101 MHz,  $\text{CDCl}_3$ ) of **2<sup>Me</sup>**

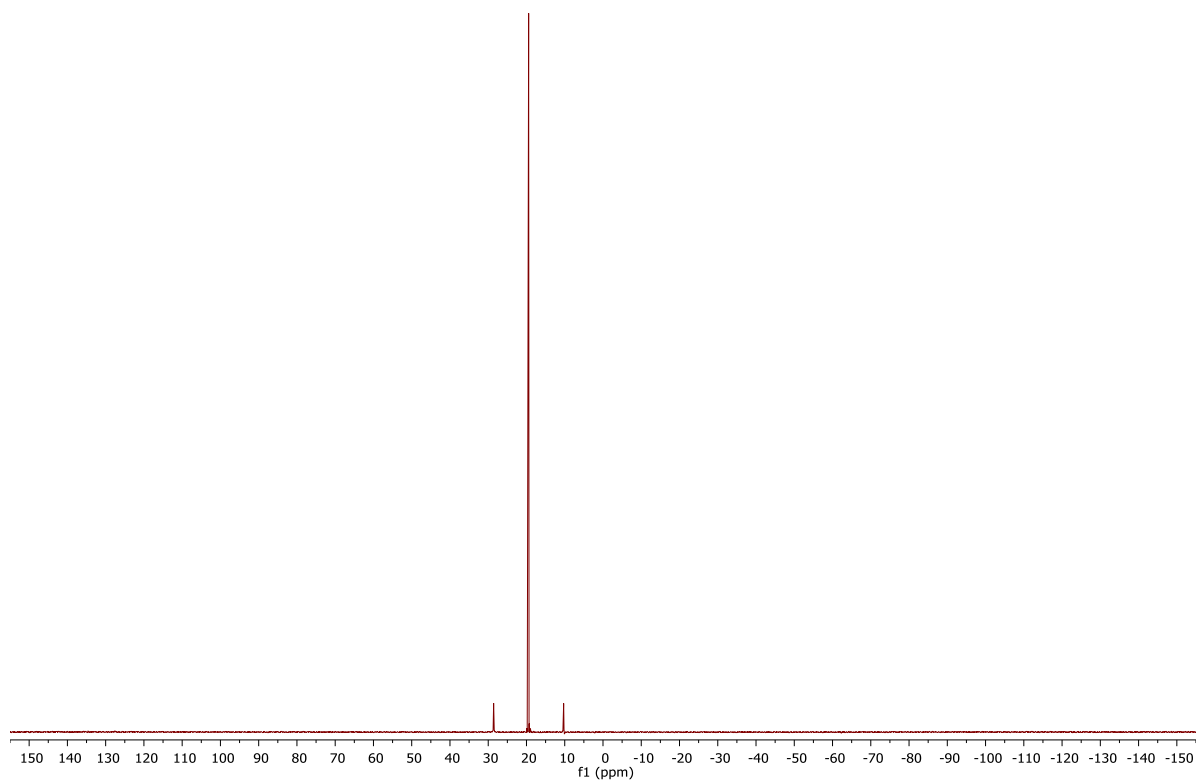

**Figure S11**  $^{31}\text{P}\{^1\text{H}\}$  NMR spectrum (162 MHz,  $\text{CDCl}_3$ ) of **2<sup>Me</sup>**

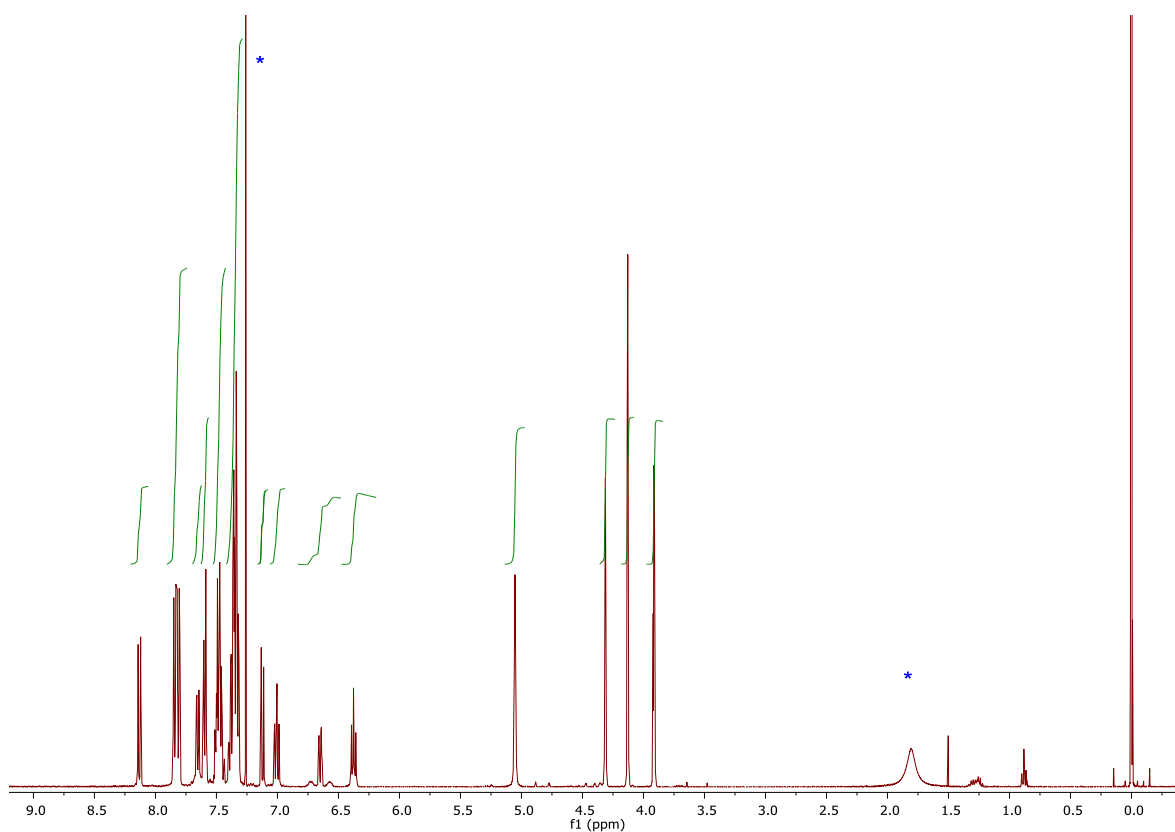

**Figure S12**  $^1\text{H}$  NMR spectrum (400 MHz,  $\text{CDCl}_3$ ) of  $2^{\text{Ph}}$

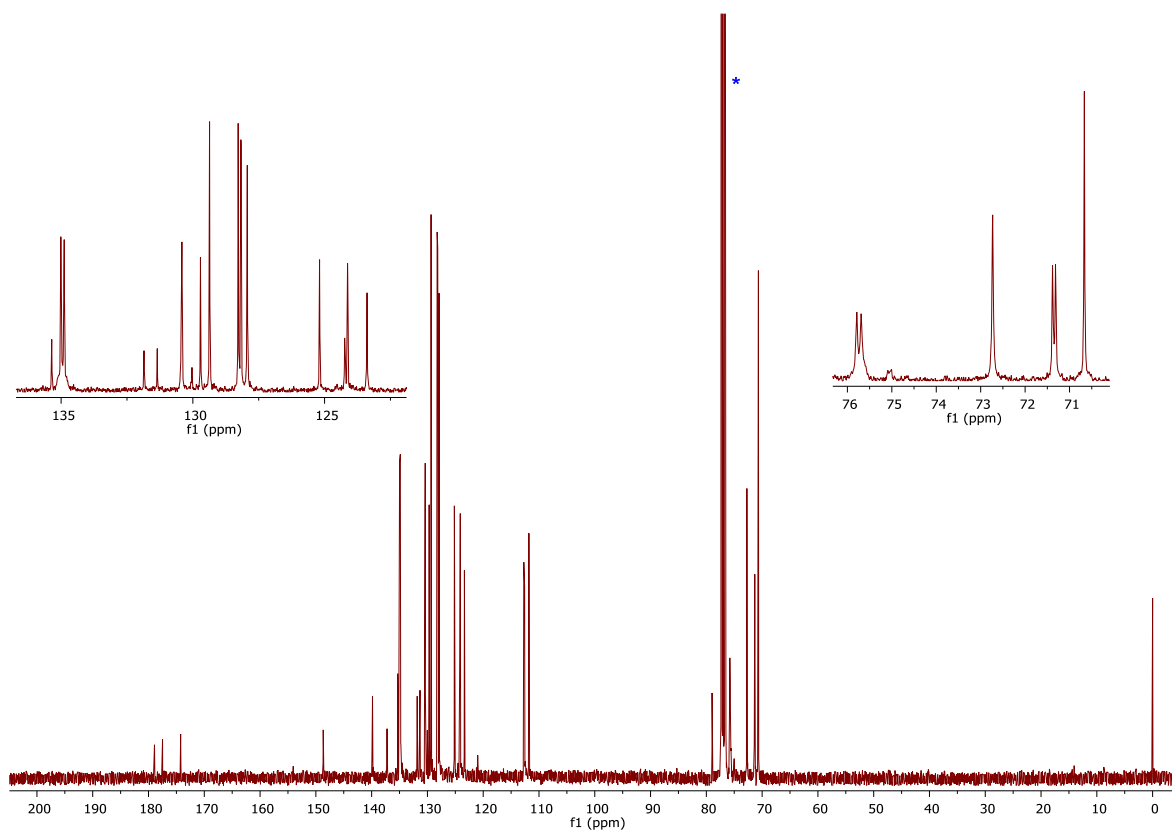

**Figure S13**  $^{13}\text{C}\{^1\text{H}\}$  NMR spectrum (101 MHz,  $\text{CDCl}_3$ ) of  $2^{\text{Ph}}$

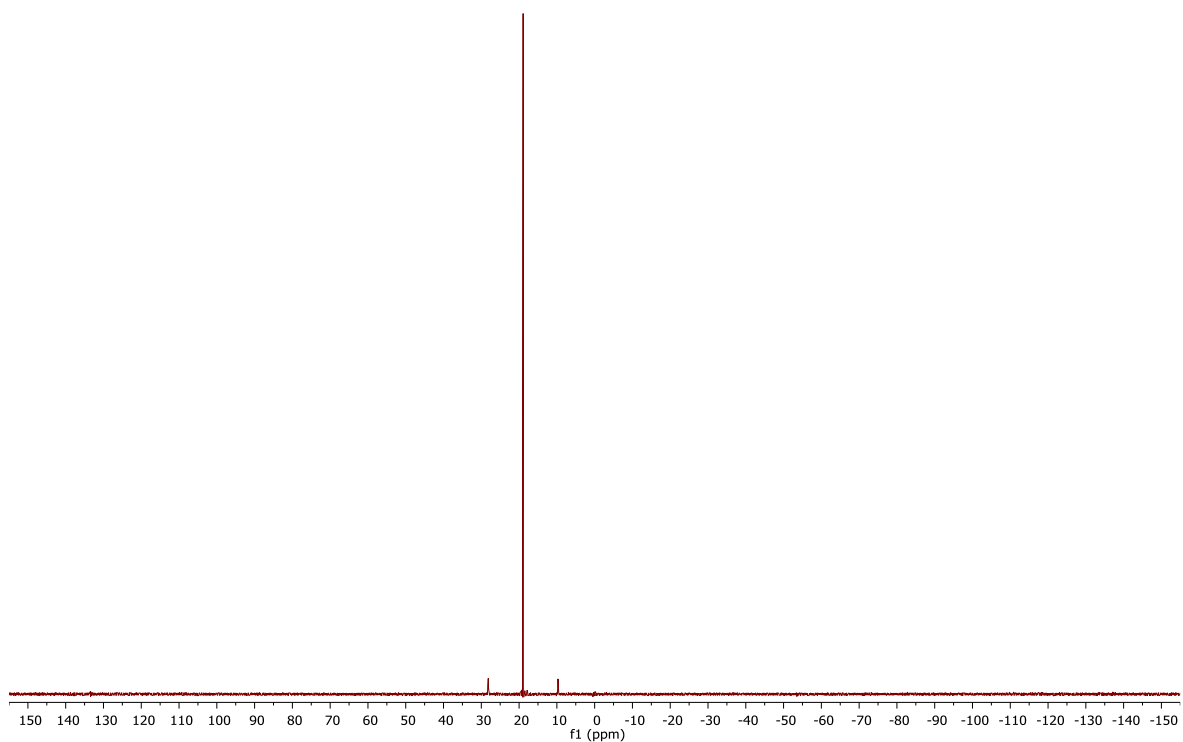

**Figure S14**  $^{31}\text{P}\{^1\text{H}\}$  NMR spectrum (162 MHz,  $\text{CDCl}_3$ ) of **2<sup>Ph</sup>**

## Cartesian coordinates of the DFT-optimised species

|                       |             |             |             |                       |             |             |             |
|-----------------------|-------------|-------------|-------------|-----------------------|-------------|-------------|-------------|
| <b>2<sup>Me</sup></b> |             |             |             | H                     | -4.99150600 | -3.89717600 | -1.75713600 |
| Pt                    | 0.86497700  | -0.03191700 | -0.08903300 | C                     | 5.69965900  | -2.65994900 | 0.78761800  |
| N                     | 3.73576000  | 0.14096000  | -0.20317500 | C                     | 6.28878100  | 0.03159100  | 0.06857500  |
| N                     | 3.30826000  | -1.92829200 | 0.36504000  | C                     | 7.00917000  | -2.18883600 | 0.77431200  |
| C                     | 4.97446600  | -0.43780000 | 0.06760200  | H                     | 7.81785000  | -2.85651200 | 1.04619400  |
| C                     | 4.69267100  | -1.76743000 | 0.43283200  | C                     | 7.29514000  | -0.86274900 | 0.42410400  |
| C                     | 1.92330900  | 1.57412800  | -0.72303100 | H                     | 8.32293700  | -0.51982600 | 0.43307400  |
| C                     | 2.72925300  | -0.76441900 | -0.00136300 | H                     | 5.47749500  | -3.68010500 | 1.07267400  |
| C                     | 3.32732200  | 1.41894700  | -0.68200800 | H                     | 6.53654600  | 1.05203200  | -0.17982900 |
| C                     | 3.70334600  | 3.56646200  | -1.68696100 | C                     | -0.59790200 | -2.67868700 | -0.45885600 |
| H                     | 4.38427000  | 4.32718000  | -2.05070800 | O                     | -0.23515000 | -1.84061900 | 0.46745800  |
| C                     | 2.32900000  | 3.74221000  | -1.77601100 | O                     | 0.11548100  | -3.12577800 | -1.35696200 |
| H                     | 1.92284400  | 4.64615500  | -2.21665600 | C                     | 2.61633700  | -3.18784200 | 0.64220100  |
| C                     | 1.45755000  | 2.75432700  | -1.30443200 | H                     | 2.24765900  | -3.20267600 | 1.66917000  |
| H                     | 0.39614100  | 2.92394500  | -1.40541900 | H                     | 1.79047100  | -3.29615000 | -0.05672200 |
| C                     | 4.21216100  | 2.38429900  | -1.14642300 | H                     | 3.32243000  | -4.00429800 | 0.49619500  |
| H                     | 5.28039900  | 2.22801900  | -1.12516200 | <b>2<sup>Ph</sup></b> |             |             |             |
| P                     | -1.34661700 | 0.93318900  | 0.25072000  | Pt                    | 0.62242500  | 0.53144900  | -0.01792300 |
| C                     | -1.93248200 | 0.68051900  | 1.99108100  | N                     | 3.38004700  | 1.25375200  | -0.41632500 |
| C                     | -1.27501100 | -0.21432800 | 2.84314300  | N                     | 3.40202600  | -0.84862200 | 0.19260700  |
| C                     | -3.02545100 | 1.40802100  | 2.48420000  | C                     | 4.72807400  | 0.89071200  | -0.36389700 |
| C                     | -1.71112600 | -0.38339300 | 4.15724600  | C                     | 4.73717100  | -0.46016200 | 0.02400100  |
| H                     | -0.44139500 | -0.79204000 | 2.46975500  | C                     | 1.29752800  | 2.39484600  | -0.45438000 |
| C                     | -3.46374300 | 1.22921300  | 3.79383300  | C                     | 2.58432900  | 0.19615300  | -0.08364400 |
| H                     | -3.52659100 | 2.13349000  | 1.85467600  | C                     | 2.69440600  | 2.48064800  | -0.66362900 |
| C                     | -2.80616600 | 0.33239600  | 4.63485700  | C                     | 2.56687300  | 4.78394000  | -1.33009700 |
| H                     | -1.19050500 | -1.07853600 | 4.80661300  | H                     | 3.05250100  | 5.69269500  | -1.66618700 |
| H                     | -4.31151000 | 1.79836000  | 4.15892600  | C                     | 1.19233600  | 4.74016100  | -1.14096200 |
| H                     | -3.14245500 | 0.19835800  | 5.65704700  | H                     | 0.58847200  | 5.62148600  | -1.32834100 |
| C                     | -1.56674000 | 2.76294600  | 0.08862800  | C                     | 0.57368100  | 3.55969200  | -0.71470000 |
| C                     | -0.91807400 | 3.60323200  | 1.00444500  | H                     | -0.49846800 | 3.56536800  | -0.59291000 |
| C                     | -2.32708400 | 3.33457300  | -0.93618700 | C                     | 3.32890500  | 3.63790000  | -1.09700700 |
| C                     | -1.03691600 | 4.98494700  | 0.90148300  | H                     | 4.39371600  | 3.66625500  | -1.27253600 |
| H                     | -0.31447300 | 3.17735700  | 1.79798200  | P                     | -1.76472200 | 0.86180100  | 0.35599500  |
| C                     | -2.43993800 | 4.72208300  | -1.04091100 | C                     | -2.31480700 | 0.13684000  | 1.97172200  |
| H                     | -2.83413200 | 2.70218400  | -1.65420100 | C                     | -1.49563500 | -0.76000800 | 2.66779100  |
| C                     | -1.79852000 | 5.54911800  | -0.12296300 | C                     | -3.55258500 | 0.49508400  | 2.52550900  |
| H                     | -0.52975300 | 5.62229400  | 1.61705400  | C                     | -1.91286900 | -1.28955100 | 3.88891900  |
| H                     | -3.03345200 | 5.15187200  | -1.84019900 | H                     | -0.55018400 | -1.06257400 | 2.24003000  |
| H                     | -1.88876100 | 6.62657300  | -0.20385200 | C                     | -3.96872100 | -0.04290000 | 3.74086600  |
| C                     | -2.65961900 | 0.27319900  | -0.83154700 | H                     | -4.18986800 | 1.21047000  | 2.01977800  |
| C                     | -4.08312100 | 0.26264700  | -0.62145700 | C                     | -3.14792900 | -0.93660900 | 4.42728500  |
| C                     | -2.42420400 | -0.21765800 | -2.16195200 | H                     | -1.26745300 | -1.98254900 | 4.41733100  |
| C                     | -4.70365800 | -0.21919900 | -1.80774300 | H                     | -4.92939100 | 0.24386700  | 4.15421700  |
| H                     | -4.59134800 | 0.54730800  | 0.28603600  | H                     | -3.46839600 | -1.35056800 | 5.37700400  |
| C                     | -3.68120400 | -0.51685700 | -2.75572600 | C                     | -2.43691000 | 2.57881700  | 0.51085600  |
| H                     | -1.45231400 | -0.36600000 | -2.60931100 | C                     | -2.04699300 | 3.35845900  | 1.60935200  |
| H                     | -5.76392800 | -0.36760200 | -1.94918000 | C                     | -3.28703200 | 3.13650200  | -0.44900100 |
| H                     | -3.82910300 | -0.93462700 | -3.74023800 | C                     | -2.50543800 | 4.66427100  | 1.74705700  |
| Fe                    | -3.39809900 | -1.64668800 | -1.02417600 | H                     | -1.37897000 | 2.94581400  | 2.35711900  |
| C                     | -2.04463500 | -3.06120800 | -0.39600600 | C                     | -3.74126000 | 4.44935100  | -0.31145500 |
| C                     | -2.96838400 | -2.76123200 | 0.65788000  | H                     | -3.59772300 | 2.55077000  | -1.30508000 |
| C                     | -2.79419000 | -3.58428600 | -1.49389800 | C                     | -3.35437700 | 5.21440500  | 0.78541700  |
| H                     | -2.70886400 | -2.32508000 | 1.60850300  | H                     | -2.19572600 | 5.25501900  | 2.60182000  |
| C                     | -4.27432500 | -3.09127400 | 0.20466600  | H                     | -4.40010200 | 4.86912400  | -1.06347700 |
| H                     | -2.37189500 | -3.86770600 | -2.44540200 | H                     | -3.70948700 | 6.23328700  | 0.89204100  |
| C                     | -4.16816300 | -3.59107100 | -1.12863700 | C                     | -2.84412700 | 0.11933500  | -0.91546000 |
| H                     | -5.19123600 | -2.95854100 | 0.75987100  |                       |             |             |             |

|                       |             |             |             |                       |             |             |             |
|-----------------------|-------------|-------------|-------------|-----------------------|-------------|-------------|-------------|
| C                     | -4.21375600 | -0.30388400 | -0.79487900 | C                     | -6.13020500 | -0.41630500 | -0.35052500 |
| C                     | -2.48319700 | -0.00217000 | -2.30133800 | H                     | -6.43278800 | -1.42571900 | -0.58121100 |
| C                     | -4.68193600 | -0.66764600 | -2.08826100 | C                     | -4.21778600 | -3.18936400 | -0.32782800 |
| H                     | -4.78053300 | -0.35806900 | 0.12106200  | H                     | -5.25405800 | -2.98951200 | -0.55672300 |
| C                     | -3.61495600 | -0.48297800 | -3.01588500 | P                     | 0.92573200  | 1.09219800  | -0.02690200 |
| H                     | -1.50556100 | 0.20329000  | -2.71193100 | C                     | 0.50558400  | 2.41611900  | -1.25268800 |
| H                     | -5.66451700 | -1.05213400 | -2.31830400 | C                     | -0.59837900 | 2.22764400  | -2.09156100 |
| H                     | -3.64468000 | -0.70631100 | -4.07180700 | C                     | 1.32235300  | 3.53907500  | -1.45517600 |
| Fe                    | -3.04746800 | -1.84451800 | -1.54106000 | C                     | -0.90431700 | 3.15812100  | -3.08515700 |
| C                     | -1.37344800 | -2.96707700 | -1.11803200 | H                     | -1.20535500 | 1.33713500  | -1.98003300 |
| C                     | -2.36677100 | -3.16295700 | -0.10389900 | C                     | 1.00997800  | 4.47303600  | -2.43887500 |
| C                     | -1.93114100 | -3.40052300 | -2.35957300 | H                     | 2.22089200  | 3.67187100  | -0.86465000 |
| H                     | -2.25487800 | -2.90225700 | 0.93571800  | C                     | -0.10777400 | 4.28747300  | -3.25342000 |
| C                     | -3.52572100 | -3.70632200 | -0.72161700 | H                     | -1.75814100 | 2.99115800  | -3.73229900 |
| H                     | -1.42872500 | -3.33757800 | -3.31228700 | H                     | 1.64908200  | 5.33736600  | -2.58143600 |
| C                     | -3.26013400 | -3.84502300 | -2.11777200 | H                     | -0.34321500 | 5.01062600  | -4.02626000 |
| H                     | -4.45634600 | -3.94428200 | -0.22762000 | C                     | 1.11089300  | 1.88408000  | 1.63714600  |
| H                     | -3.95687000 | -4.20151200 | -2.86220600 | C                     | 1.24868500  | 0.99921100  | 2.71816500  |
| C                     | 3.03459700  | -2.14359300 | 0.70594000  | C                     | 1.09702000  | 3.26089600  | 1.88600700  |
| C                     | 3.00083200  | -3.23978500 | -0.14884900 | C                     | 1.39394100  | 1.48648600  | 4.01458000  |
| C                     | 2.79067200  | -2.28419900 | 2.06969900  | H                     | 1.23160600  | -0.07045400 | 2.53921100  |
| C                     | 2.70966400  | -4.49754400 | 0.37480800  | C                     | 1.22873400  | 3.74445800  | 3.18830600  |
| H                     | 3.15489300  | -3.09803600 | -1.20991100 | H                     | 0.97379000  | 3.96438000  | 1.07253600  |
| C                     | 2.49699900  | -3.54429200 | 2.58403300  | C                     | 1.38364100  | 2.86043000  | 4.25355700  |
| H                     | 2.82583000  | -1.41319700 | 2.71330500  | H                     | 1.50281700  | 0.79099400  | 4.83921200  |
| C                     | 2.45829500  | -4.65130900 | 1.73712600  | H                     | 1.21174000  | 4.81406400  | 3.36667100  |
| H                     | 2.66420600  | -5.35395300 | -0.28764600 | H                     | 1.48824600  | 3.23862700  | 5.26428100  |
| H                     | 2.30042100  | -3.66053100 | 3.64369900  | C                     | -2.37313700 | 2.48459400  | 0.79575000  |
| H                     | 2.22782900  | -5.63197300 | 2.13788500  | H                     | -2.94016600 | 2.91136800  | 1.62549800  |
| C                     | 5.91568800  | -1.17667300 | 0.19497100  | H                     | -1.39539500 | 2.19797400  | 1.16492300  |
| C                     | 5.93086200  | 1.56213400  | -0.59026200 | H                     | -2.26599600 | 3.22937000  | 0.00542900  |
| C                     | 7.11024800  | -0.50185700 | -0.03814700 | C                     | 2.68594000  | 0.84683200  | -0.51414700 |
| H                     | 8.05079300  | -1.02607700 | 0.08140900  | C                     | 3.12092200  | 0.41799100  | -1.81425300 |
| C                     | 7.11335700  | 0.84539200  | -0.42316900 | C                     | 3.84729200  | 1.32706300  | 0.18398700  |
| H                     | 8.05822400  | 1.34715200  | -0.59522900 | C                     | 4.52129400  | 0.64976200  | -1.91461100 |
| H                     | 5.89734200  | -2.21578500 | 0.49711800  | H                     | 2.49279900  | -0.02871200 | -2.57068300 |
| H                     | 5.96785700  | 2.60040100  | -0.88066600 | C                     | 4.97107300  | 1.20498100  | -0.68091000 |
| C                     | -0.09223300 | -2.19940800 | -0.98504700 | H                     | 3.86036900  | 1.70612700  | 1.19389000  |
| O                     | -0.00174400 | -1.54352800 | 0.13689600  | H                     | 5.14029900  | 0.40374400  | -2.76451600 |
| O                     | 0.71447600  | -2.18586800 | -1.91165100 | H                     | 5.99004400  | 1.46138300  | -0.43176400 |
| <b>3<sup>Me</sup></b> |             |             |             | Fe                    | 4.10638600  | -0.66537600 | -0.36118800 |
| Pt                    | -0.74448100 | -0.78190900 | 0.17776200  | C                     | 3.16925600  | -2.45908000 | -0.04941400 |
| N                     | -3.59431100 | -0.77402000 | -0.14688400 | C                     | 4.22852600  | -2.63763400 | -0.99034200 |
| N                     | -3.06651200 | 1.30019400  | 0.31364400  | C                     | 3.75010600  | -1.99834200 | 1.17789300  |
| C                     | -4.79588700 | -0.06850600 | -0.13785800 | H                     | 4.09168300  | -2.93816100 | -2.01739400 |
| C                     | -4.45070300 | 1.26226000  | 0.15170200  | C                     | 5.44820500  | -2.27238600 | -0.35690900 |
| C                     | -1.93857400 | -2.41974400 | 0.13210700  | H                     | 3.19899000  | -1.75217800 | 2.07062700  |
| C                     | -2.53072200 | 0.06496500  | 0.10784900  | C                     | 5.15307000  | -1.88371200 | 0.98498800  |
| C                     | -3.29263900 | -2.16986900 | -0.13412700 | H                     | 6.42556500  | -2.26501100 | -0.81662400 |
| C                     | -6.73242500 | 1.91782900  | 0.02896200  | H                     | 5.86958700  | -1.53709300 | 1.71518000  |
| H                     | -7.50272200 | 2.67735600  | 0.08688100  | C                     | 1.71700400  | -2.42210800 | -0.41184400 |
| C                     | -7.08554400 | 0.59431900  | -0.26175800 | O                     | 0.98781300  | -1.91153500 | 0.54194400  |
| H                     | -8.12750100 | 0.34572000  | -0.42465800 | O                     | 1.33727000  | -2.76665400 | -1.52388600 |
| C                     | -3.78195700 | -4.51215300 | -0.22275700 | <b>3<sup>Ph</sup></b> |             |             |             |
| H                     | -4.49061000 | -5.31912800 | -0.36980000 | C                     | -5.76118200 | -1.53034400 | -0.85890500 |
| C                     | -2.44912300 | -4.78816800 | 0.06479000  | C                     | -4.60632600 | -1.24858200 | -1.63815300 |
| H                     | -2.11487300 | -5.81672400 | 0.14650400  | C                     | -3.52247500 | -2.02161000 | -1.11571400 |
| C                     | -1.53191100 | -3.74681900 | 0.23606900  | C                     | -4.02045800 | -2.79275800 | -0.01835800 |
| H                     | -0.49292400 | -3.96943500 | 0.43598200  | C                     | -5.40247800 | -2.49039500 | 0.13537300  |
| C                     | -5.40203400 | 2.27244600  | 0.24043800  | Fe                    | -4.23062000 | -0.78290300 | 0.35989500  |
| H                     | -5.12353600 | 3.29559700  | 0.45957100  | C                     | -4.91227900 | 0.83786400  | 1.46770200  |

|    |             |             |             |   |             |             |             |
|----|-------------|-------------|-------------|---|-------------|-------------|-------------|
| C  | -3.86593000 | 1.25307000  | 0.59594300  | H | 7.67119400  | 1.44907100  | 0.04340700  |
| C  | -2.68223100 | 0.50460300  | 0.91942200  | H | 7.96468900  | -0.95057800 | 0.54509700  |
| C  | -3.02700900 | -0.38632700 | 1.99051200  | H | 3.64575700  | -6.06431200 | 0.33605900  |
| C  | -4.39248400 | -0.17020800 | 2.33260500  | H | 1.26579000  | -6.25281700 | -0.34025900 |
| P  | -0.95152800 | 0.88229500  | 0.38883200  | H | -0.10116700 | -4.20501400 | -0.66258300 |
| C  | -1.25912900 | 2.25701900  | -0.81890800 | H | 5.40166400  | 2.38910400  | -0.35103200 |
| C  | -1.59304000 | 1.89053800  | -2.13125300 | H | 6.03993000  | -2.47250700 | 0.65591500  |
| C  | -1.94137600 | 2.86613800  | -3.06379200 | H | 4.67279100  | -3.85343300 | 0.64469200  |
| C  | -1.94748900 | 4.21416900  | -2.70853600 | H | 1.46048500  | 0.60715100  | 2.04241300  |
| C  | -1.58737900 | 4.58444700  | -1.41508400 | H | -2.19676000 | 2.83724300  | 2.27533500  |
| C  | -1.24287400 | 3.61324100  | -0.47538400 | H | 2.20265000  | 1.60099700  | 4.17416800  |
| C  | -2.08794700 | -1.79422500 | -1.45870900 | H | -1.45219700 | 3.84325300  | 4.38846200  |
| O  | -1.77310900 | -1.24436400 | -2.51299800 | H | 0.75501400  | 3.23804400  | 5.35492600  |
| Pt | 0.51922900  | -1.09266200 | -0.23850700 | H | -1.59089800 | 0.84526100  | -2.42433800 |
| O  | -1.28223600 | -2.13974800 | -0.49938200 | H | -0.96167100 | 3.92430400  | 0.52165200  |
| C  | 1.50495400  | -2.86058700 | -0.23113000 | H | -2.20903700 | 2.56538600  | -4.07088900 |
| C  | 2.86091400  | -2.78541000 | 0.12019100  | H | -1.57497800 | 5.63123300  | -1.13091200 |
| C  | 3.63822200  | -3.91696800 | 0.34239100  | H | -2.22472200 | 4.97015400  | -3.43528400 |
| C  | 3.05132200  | -5.17284300 | 0.17216100  | H | -2.36029600 | -1.10169800 | 2.44741900  |
| C  | 1.71514500  | -5.27514400 | -0.20256100 | H | -3.94323800 | 1.99821200  | -0.18001400 |
| C  | 0.94425300  | -4.12457700 | -0.39526700 | H | -4.94560000 | -0.70561000 | 3.08994800  |
| N  | 3.32736700  | -1.43861800 | 0.19012200  | H | -5.92802200 | 1.20423600  | 1.45465900  |
| C  | 4.61073800  | -0.89444700 | 0.22391500  | H | -3.42758300 | -3.44880500 | 0.59855000  |
| C  | 4.45308400  | 0.47364300  | -0.04342300 | H | -4.52748200 | -0.54682800 | -2.45342800 |
| N  | 3.07816700  | 0.70071800  | -0.22171900 | H | -6.06051400 | -2.89415500 | 0.89062400  |
| C  | 2.38368100  | -0.46730700 | -0.06850300 | H | -6.73562200 | -1.08094600 | -0.98099900 |
| C  | 5.53720000  | 1.34045100  | -0.12271200 | C | 2.12764200  | 1.98524100  | -2.06855300 |
| C  | 6.80302200  | 0.80314400  | 0.09546000  | C | 1.81042200  | 3.21443200  | -2.64016400 |
| C  | 6.96863800  | -0.55825600 | 0.37779400  | C | 1.96931500  | 4.38995900  | -1.90976100 |
| C  | 5.88212400  | -1.42694800 | 0.44363400  | C | 2.42477000  | 4.33751100  | -0.59351400 |
| C  | 2.59775800  | 1.94299300  | -0.75725100 | C | 2.73772200  | 3.11231100  | -0.01064600 |
| C  | -0.39119800 | 1.69161700  | 1.96696200  | H | 2.02259300  | 1.06534200  | -2.63058100 |
| C  | 0.83735500  | 1.34071800  | 2.53478800  | H | 1.44024400  | 3.25036600  | -3.65732900 |
| C  | 1.25065300  | 1.89587000  | 3.74641000  | H | 1.72761700  | 5.34450800  | -2.36207300 |
| C  | 0.43737000  | 2.80886200  | 4.41113100  | H | 2.53422800  | 5.24875700  | -0.01686200 |
| C  | -0.80089700 | 3.15058800  | 3.86691300  | H | 3.09080300  | 3.05990200  | 1.01179900  |
| C  | -1.21586600 | 2.59035600  | 2.66221900  |   |             |             |             |
